# Supplementary material for: Incorporation of deuterium oxide in MCF-7 cells to shed further mechanistic insights into benzo[a]pyrene-induced low-dose effects discriminated by ATR-FTIR spectroscopy
Source: Royal Society of Chemistry journal article supplement (doi:10.1039/c3an36721e), 2013-01-01
Supplement: c3an36721e.pdf [file c3an36721e.pdf]

# **Electronic Supplementary Information**

## **Incorporation of deuterium oxide in MCF-7 cells to shed further mechanistic insights into benzo[*a*]pyrene-induced low-dose effects discriminated by ATR-FTIR spectroscopy**

*Lara D. Heppenstall,<sup>1</sup> Rebecca Strong,<sup>1</sup> Júlio Trevisan,<sup>1,2</sup> Francis L. Martin<sup>1</sup>*

<sup>1</sup>Centre for Biophotonics, Lancaster Environment Centre, Lancaster University, Lancaster, UK; <sup>2</sup>School of Computing and Communications, Infolab 21, Lancaster University, Lancaster, UK

**A)**

| Trial | DMSO | 10 <sup>-10</sup> M | 10 <sup>-6</sup> M |
|-------|------|---------------------|--------------------|
| 1     | 372  | 310                 | 0                  |
| 2     | 304  | 221                 | 0                  |
| 2     | 362  | 213                 | 0                  |

**B)**

| Parameter                                         | Value             |       |                  |                  |
|---------------------------------------------------|-------------------|-------|------------------|------------------|
| <b>One-way analysis of variance</b>               |                   |       |                  |                  |
| <i>P</i> -value                                   | <i>P</i> < 0.0001 |       |                  |                  |
| <i>P</i> -value summary                           | ***               |       |                  |                  |
| Means significantly different? ( <i>P</i> < 0.05) | Yes               |       |                  |                  |
| Number of groups                                  | 3                 |       |                  |                  |
| F                                                 | 67.4              |       |                  |                  |
| R <sup>2</sup>                                    | 0.9574            |       |                  |                  |
| <b>ANOVA table</b>                                |                   |       |                  |                  |
|                                                   | SS                | df    | MS               |                  |
| Treatment (between columns)                       | 190800            | 2     | 95410            |                  |
| Residual (within columns)                         | 8494              | 6     | 1416             |                  |
| Total                                             | 199300            | 8     |                  |                  |
| <b>Tukey's Multiple Comparison Test</b>           |                   |       |                  |                  |
|                                                   | Mean Diff.        | q     | <i>P</i> -value  | 95% CI of diff   |
| 10 <sup>-6</sup> M vs. 10 <sup>-10</sup> M        | -248              | 11.42 | <i>P</i> < 0.001 | -342.3 to -153.7 |
| 10 <sup>-6</sup> M vs. DMSO                       | -346              | 15.93 | <i>P</i> < 0.001 | -440.3 to -251.7 |
| 10 <sup>-10</sup> M vs. DMSO                      | -98               | 4.511 | <i>P</i> < 0.05  | -192.3 to -3.744 |

**Figure S1.** Clonogenic assay: one-way ANOVA with Tukey's multiple comparison post-hoc test.

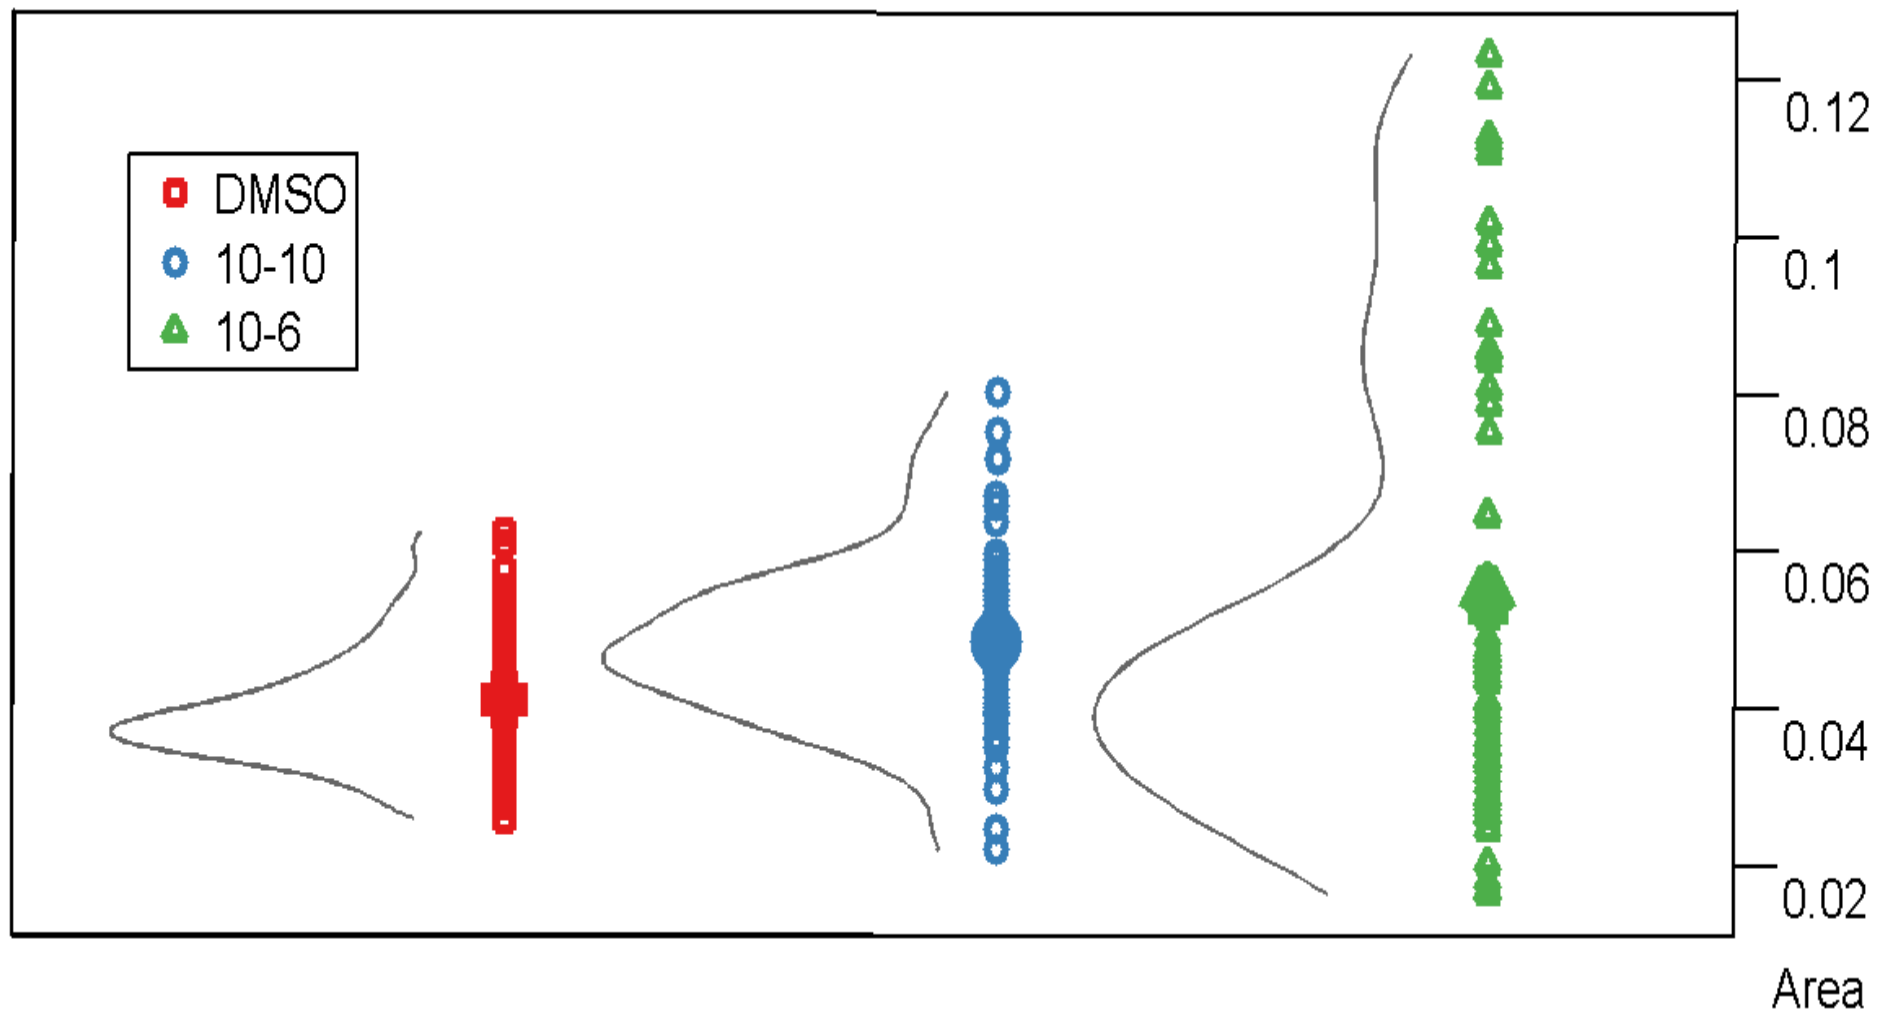

**Figure S2.** Protocol 1 - S-phase: protein-to-lipid ratio (1760-1720 cm<sup>-1</sup> vs. 1420-1380 cm<sup>-1</sup>).

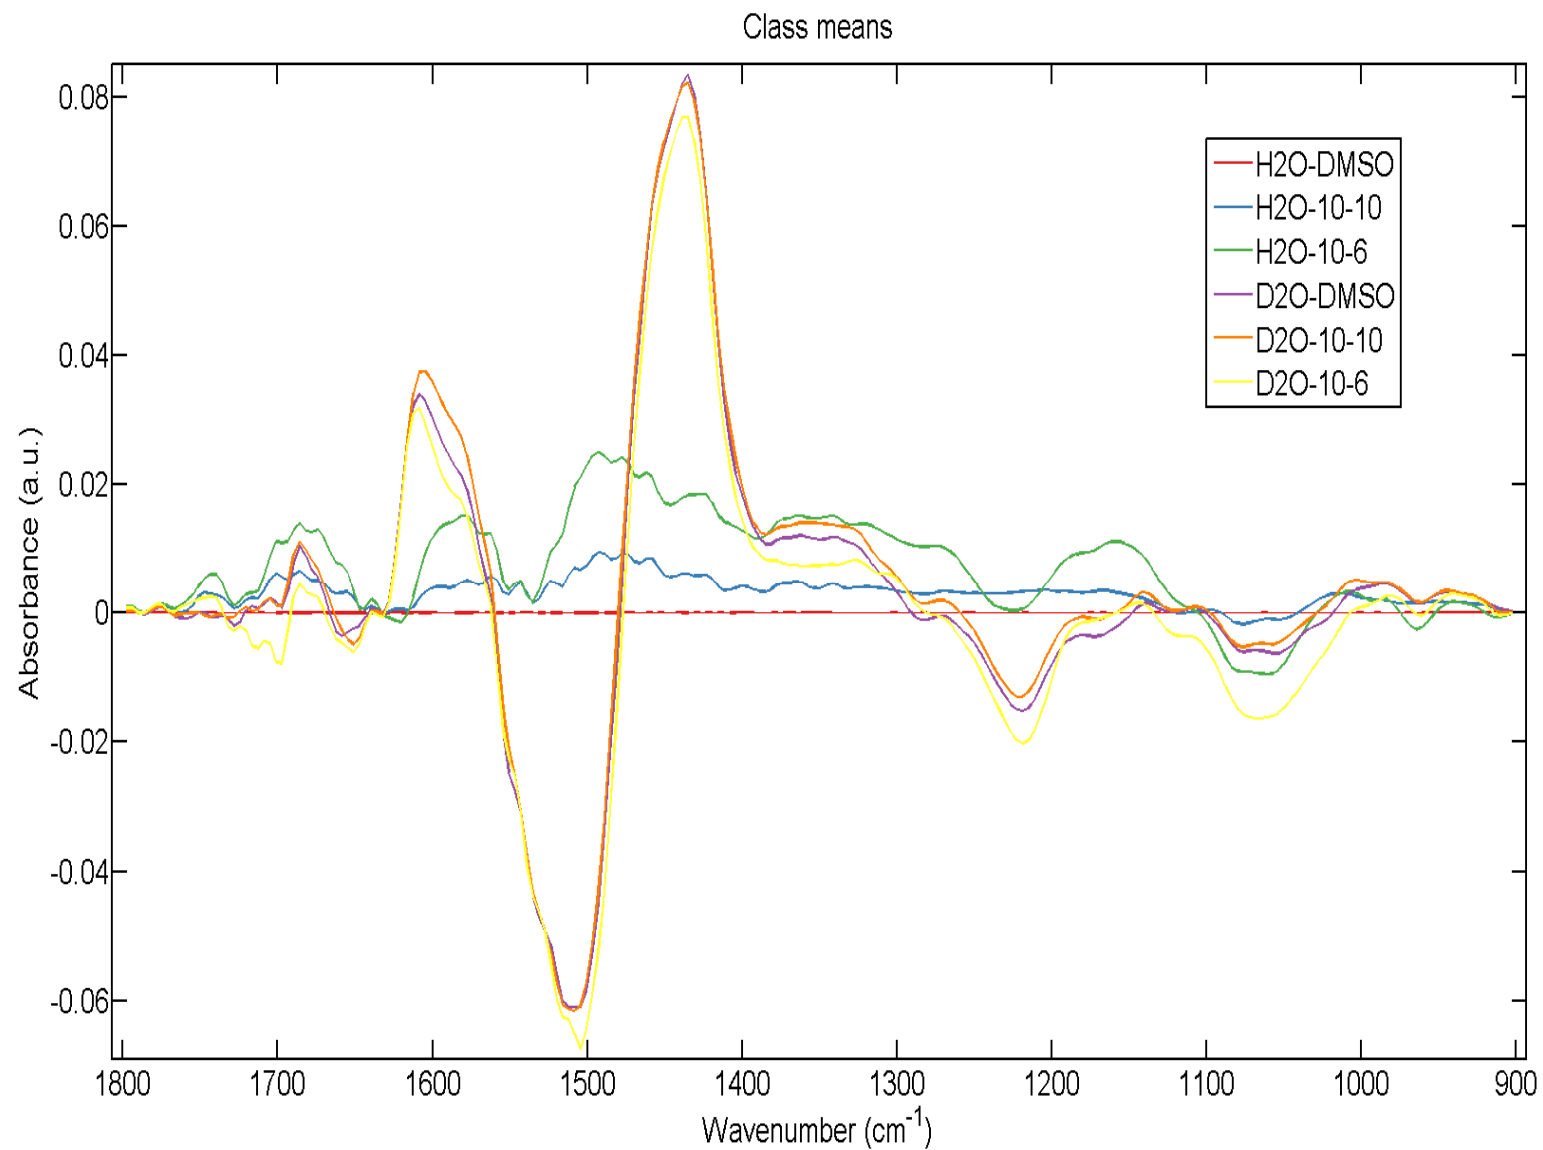

**Figure S3.** Protocol 2 – D<sub>2</sub>O- vs. H<sub>2</sub>O-fixed class means with a reference mean subtracted (H<sub>2</sub>O: DMSO).

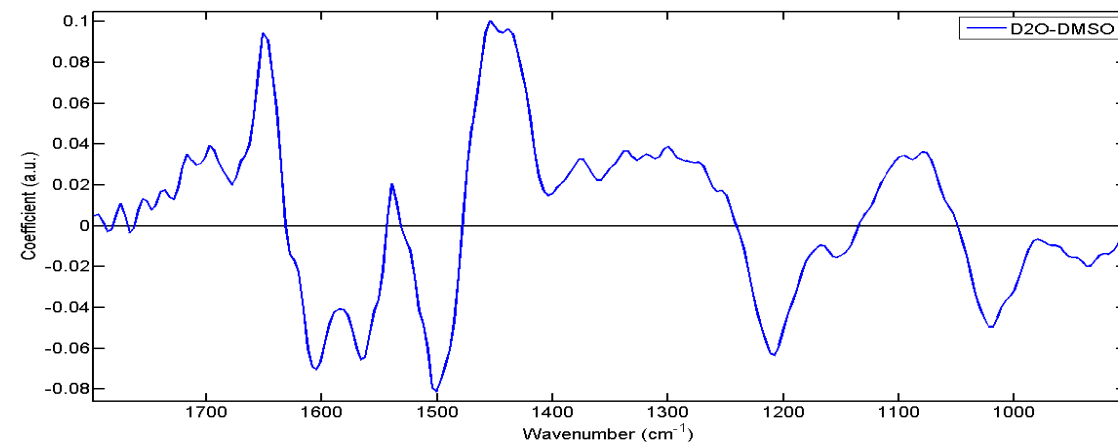

**Figure S4A.** Protocol 2: Vehicle control DMSO treatments fixed in 70% EtOH + 30% D<sub>2</sub>O compared to fixation in 70% EtOH + 30% dH<sub>2</sub>O alone.

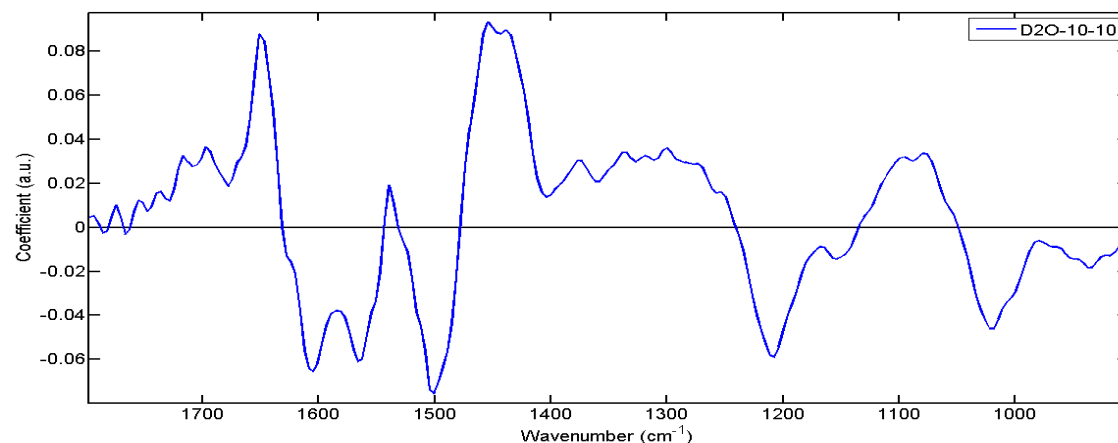

**Figure S4B.** Protocol 2: Low-dose 10<sup>-10</sup> M B[a]P treatments fixed in 70% EtOH + 30% D<sub>2</sub>O compared to fixation in 70% EtOH + 30% dH<sub>2</sub>O alone.

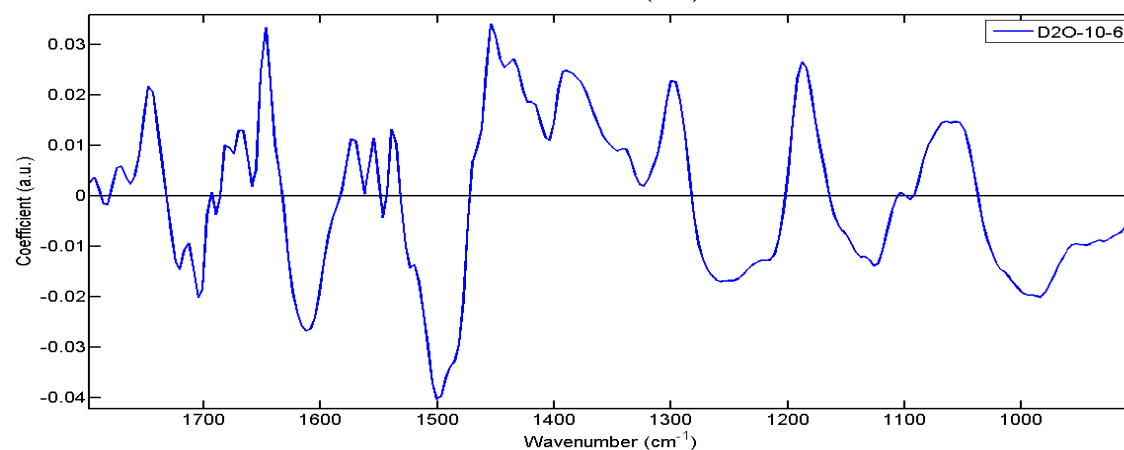

**Figure S4C.** Protocol 2: High-dose 10<sup>-6</sup> M B[a]P treatments fixed in 70% EtOH + 30% D<sub>2</sub>O compared to fixation in 70% EtOH + 30% dH<sub>2</sub>O alone.
